# Supplementary material for: Cucurbitaceae COld Peeling Extracts (CCOPEs) Protect Plants From Root-Knot Nematode Infections Through Induced Resistance and Nematicidal Effects
Source: Front Plant Sci. 2022 Jan 26;12:785699. doi: 10.3389/fpls.2021.785699 (PMC8826469; doi:10.3389/fpls.2021.785699)
Supplement: Supplementary file 5 [file Table_5.XLSX]

## Sheet: Sheet1
Supplementary Information 12: Primers used for the in planta mRNA quantification via RT-qPCR and annotations of the accompanying 36 candidate PTI marker genes
Supplementary Table 5. Sequences of the primers used for the in vitro identification of candidate IR stimuli.
GENE NAME	GENE ID	FORWARD PRIMER	REVERSE PRIMER
OsBAK1	Os03g0440900	CCTCTTCGAAGCTTTGAGAACA	TTTATCAACGGACGACATGC
Os4CL5	Os08g0448000	GCAAAGCAGGTGGTGTTCTAC	CATGCCAGTTTCATCAGCAC
OsRIN4	Os04g0379600	GTGAAACAGACATGCCCTTG	TGAACAGAGTTCGATGAAAATTG
OsPUB40	Os02g0738200	TTTGAGTGTGCAGAGAGATCG	TGTACCACTGCCAAATACGG
UNKN7	Os03g0568500	CTGGCCTCAGTGCTTTGAT	GCAAAGCCTGGTTCACTCTT
UNKN9	Os07g0506000	CTTTCTGGCAGGGTTTTGC	CGGAGAAGAAGACCATTTCG
Reference gene 1	Os03g0387800	TGTGAGCAGCTTCTCGTTTG	TGTTGTTGCCTGTGAGATCG
Reference gene 2	Os07g0114300	AGGAACATGGAGAAGAACAAGG	CAGAGGTGGTGCAGATGAAA
